## Two phenotypes of Chronic Recurrent Multifocal Osteomyelitis with different patterns of bone involvement

Dita Cebecauerová<sup>1</sup>, Hana Malcová<sup>1</sup>, Veronika Koukolská<sup>2</sup>, Zuzana Kvíčalová<sup>3</sup>, Ondřej Souček<sup>4</sup>, Lukáš Wagenknecht<sup>5</sup>, Jiří Bronský<sup>4</sup>, Zdeněk Šumník<sup>4</sup>, Martin Kynčl<sup>2</sup>, Marek Cebecauer<sup>3</sup> and Rudolf Horváth<sup>1</sup>

<sup>1</sup> Department of Paediatric and Adult Rheumatology, Motol University Hospital , Prague, Czech Republic

<sup>2</sup> Department of Radiology, Second Faculty of Medicine, Charles University and Motol University Hospital, Prague, Czech Republic.

<sup>3</sup> Department of Biophysical Chemistry, J. Heyrovsky Institute of Physical Chemistry of the Czech Academy of Sciences, Prague, Czech Republic

<sup>4</sup> Department of Pediatrics, Second Faculty of Medicine, Charles University and Motol University Hospital, Prague, Czech Republic.

<sup>5</sup> Department of Ortopaedics, Second Faculty of Medicine, Motol University Hospital, Prague, Czech Republic

Corresponding author: Dita Cebecauerova M.D, PhD., [dita.cebecauerova@fnmotol.cz](mailto:dita.cebecauerova@fnmotol.cz)

## 1 Abstract

2

3 **Introduction:** Chronic Recurrent Multifocal Osteomyelitis (CRMO) is an autoinflammatory bone  
4 disorder with predominantly paediatric onset. Children present with multifocal osteolytic lesions  
5 accompanied by bone pain and soft tissue swelling. Patients often exhibit extraosseous co-morbidities  
6 such as psoriasis, inflammatory bowel disease, and arthritis.

7 **Objectives:** Comparison of children with two different phenotypes of CRMO defined by presence or  
8 absence of extraosseous co-morbidities.

9 **Methods:** Children diagnosed with CRMO at the Motol University Hospital between 2010-2020 were  
10 retrospectively reviewed, and according to the absence or presence of extraosseous manifestations  
11 divided into two cohorts – osteolytic CRMO and complex CRMO. The two groups were compared in  
12 terms of demographic data, age at disease onset, number and site of bone lesions, laboratory  
13 biomarker values, and need of escalation to a second-line therapy

14 **Results:** Thirty-seven children (30 female, 7 male) with confirmed CRMO were included in the analysis.  
15 The mean age at disease onset was ten years. All but 3 patients presented with multifocal disease.  
16 Twenty-three children (62%) had at least one extraosseous manifestation (13 sacroiliitis, 8  
17 inflammatory bowel disease, 6 skin disease [acne, pustulosis, or psoriasis], 7 arthritis). Complex CRMO  
18 was associated with a significantly higher ESR rate ( $p=0.0064$ ) and CRP level ( $p=0.018$ ). The groups did  
19 not differ in number of foci or in age at disease onset. Bone lesion distribution differed between the  
20 two groups with significantly more frequent involvement of clavicle ( $p=0.011$ ) and pelvis ( $p=0.038$ ) in  
21 patients with complex CRMO. Children with complex CRMO more often needed escalation of therapy  
22 to DMARDs and biologic agents.

23 **Conclusion:** Our data suggest that CRMO affecting solely the skeleton has milder course compared to  
24 complex CRMO with extraskeletal features. Further studies are needed to explore the clinical as well  
25 as the patient reported outcomes and promote individually tailored therapeutic strategies in both  
26 CRMO phenotypes.

## 27 Keywords

28 Autoinflammatory disease, chronic non-bacterial osteomyelitis, chronic recurrent multifocal  
29 osteomyelitis, inflammatory bowel disease, sacroiliitis, whole-body magnetic resonance imaging

30

## 31 Introduction

32

33 Chronic Recurrent Multifocal Osteomyelitis (CRMO) is a rare autoinflammatory disorder characterized  
34 by sterile bone lesions <sup>1,2</sup>. It is often referred to as a subgroup within Chronic Non-Bacterial  
35 Osteomyelitis (CNO). For patients with concomitant acne or pustulosis the acronym SAPHO (Synovitis,  
36 acne, pustulosis, hyperostosis, osteitis) is used. CRMO incidence is estimated at 1:250 000 <sup>3</sup>; precise  
37 values remain unknown. However, the number of diagnosed cases has increased lately with improved  
38 public and care-provider awareness and better accessibility of whole-body magnetic resonance  
39 imaging (WB-MRI) <sup>4,5</sup>. It affects predominantly young girls with peak presentation at age 10 years <sup>6-8</sup>,  
40 typically with bone pain accompanied by local warmth and soft tissue swelling. The disease course is  
41 recurrent or persistent with a variable number of osteolytic lesions developing over time. The unifocal  
42 and persistent form is more common in adult patients <sup>9</sup>. Adults and adolescents often display  
43 involvement of clavicle and sternum and have various cutaneous manifestations <sup>9,10</sup>.

44 The molecular pathogenesis is not fully understood, but there is a consensus that CRMO is an  
45 autoinflammatory disease, characterized by unprovoked spontaneous flares of tissue-specific bone  
46 inflammation. The fact that different autoimmune conditions frequently affect pedigrees of CRMO  
47 patients emphasizes the role of genetic predispositions. However, specific genetic variants are  
48 characterised only in a small proportion of patients <sup>11-14</sup>. Typical examples of monogenic forms of  
49 osteomyelitis represent Majeed syndrome or DIRA (Deficiency of Interleukin-1 Receptor Antagonist),  
50 with an altered IL-1 signalling pathway. Mutations in the coding and regulatory parts of *FLBIM1* are  
51 found in a minority of children with non-syndromic CRMO together with an altered IL-10 signalling  
52 pathway <sup>11,12</sup>. These variants are, nevertheless, considered as contributing to rather than as underlying  
53 CRMO. At this writing, no other entries for CRMO exist in the Online Mendelian Inheritance in Man  
54 database<sup>15</sup>. Clinically, CRMO shares significant overlap with TNF $\alpha$ -related autoimmune conditions  
55 such as spondyloarthritis, psoriasis, and inflammatory bowel disease (IBD). Indeed, CRMO and/or  
56 SAPHO syndrome may, over time, evolve into spondyloarthropathy in some patients <sup>16</sup>. The available  
57 data are limited but suggest that aetiopathogenesis of CRMO is complex and that a probably  
58 heterogenous genetic background underlies a seemingly uniform phenotype.

59 Recent reports indicate that about half of CRMO patients have associated extraosseous involvement,  
60 mostly psoriasis and palmo-plantar pustulosis, IBD, and arthritis. The frequency of particular co-  
61 morbidities varies significantly among reported cohorts<sup>6,8,9,17,18</sup>. Whilst cutaneous involvement is  
62 reported in 10-30% of patients, IBD is diagnosed in a much smaller group (5-13%). Arthritis varies  
63 significantly between individual cohorts (6-56%). Evidently, more studies are required better to  
64 understand these complex relations between CRMO and associated conditions.

65 So far, no specific guidelines exist for the treatment of children with CRMO. Therapy response  
66 assessment is complicated by the lack of a definition of disease remission. Based on current treatment  
67 practices, Zhao et al. published consensus treatment plans for CRMO refractory to non-steroidal anti-

68 inflammatory drugs (NSAIDs)<sup>10</sup>. Whereas NSAIDs represent first-line treatment, bisphosphonates are  
69 used in case of spinal involvement or NSAIDs failure. Disease-modifying anti-rheumatic drugs  
70 (DMARDs) and short-course corticosteroids can be used to escalate therapy; however, disease  
71 remission is achieved in fewer patients for whom these approaches are required<sup>6,9,19,20</sup>. Biologic  
72 DMARDs, primarily tumour necrosis factor  $\alpha$  inhibitors (TNFi), are the preferred choice in refractory  
73 disease or associated conditions, including sacroiliitis or IBD<sup>21,22</sup>.

74 This study postulated that the two distinct phenotypic manifestations of CRMO – a solely osteolytic  
75 form, with only bone involvement, and a complex form, characterised by the presence of extrasosseous  
76 associated conditions – might differ in clinical and laboratory aspects of disease, and sought to  
77 compare cohorts of children with the two forms of CRMO.

78

## 79 **Methods**

80 We retrospectively reviewed and analysed a cohort of paediatric CRMO patients diagnosed and  
81 treated at Motol University Hospital, Prague, between 2010 and 2020. Only children still followed-up  
82 in Motol University Hospital, were included in the study. The diagnosis was based on the typical clinical  
83 and radiological findings and in 62% of children was completed by histologic and microbiologic  
84 confirmation of chronic non-bacterial osteomyelitis. Bristol criteria<sup>17,23</sup> were applied retrospectively  
85 to all patients included in the study. The study was approved by the local Ethics Committee (EK  
86 1412/20). Written informed consent was obtained from patients or legal guardians before study  
87 enrolment. From medical records we collected clinical data, including family history, gender, ethnicity,  
88 age of disease onset, first symptoms at manifestation, number and distribution of bone lesions, biopsy  
89 results, microbiologic results, spinal involvement, inflammatory and immunological marker values,  
90 faecal calprotectin levels, extrasosseous disease, and therapy. WB-MRI and X-ray imaging were re-  
91 assessed by an experienced radiologist. Sacroiliac-joint involvement was diagnosed only when typical  
92 oedema of subchondral bone was present.

### 93 *Statistical analysis*

94 Fisher's exact test was used to compare the two groups of patients with lesions present and absent at  
95 a given site. All datasets (age at onset, number of foci, erythrocyte sedimentation rate [ESR], and  
96 serum C-reactive protein [CRP]) were first tested for normality using quantile-quantile plots and the  
97 Anderson-Darling test. Number of lesions and age at onset showed normal distributions with equal  
98 variance (two-sample F-test). Two-sample unpaired Student's t-testing was used to compare the  
99 means between the osteolytic and complex CRMO groups. For ESR and CRP parameters not following  
100 a normal distribution, means were compared with the two-sample Kolmogorov-Smirnoff test.  
101 Statistical analyses were performed using appropriate functions of MATLAB software (Mathworks,  
102 Natick, MA).

103

## 104 Results

105 Thirty-seven children, 30 girls (81%) and 7 boys (19%), were enrolled in the study (Fig. 1). Their clinical  
106 characteristics are summarized in Tab. 1. The initial symptom in most cases was limb pain (51%),  
107 followed by back pain (38%). The prevalently affected site was pelvis (59%), followed by femur (49%),  
108 tibia (43%), spine (38%), and clavicle (35%). Clavicular swelling as a first sign was present in 2 patients  
109 (5%); however, WB-MRI revealed asymptomatic clavicular lesions in 11 more children, with bilateral  
110 involvement in 4. Diaphyseal regions were affected in 9 children (24%). In six the lesion laid within the  
111 large metaphyseal-diaphyseal region. Solely diaphyseal lesions were confirmed in 4 children (11%).  
112 The least involved regions were skull, mandible, and scapula, with involvement in 2 children each. Just  
113 3 patients (8%) were proven to have a single osteolytic site on WB-MRI. These solitary lesions were in  
114 10<sup>th</sup> thoracic vertebra, clavicle, and humerus.

115 Inflammation-marker values were elevated at presentation in most of the patients. ESR and/or CRP  
116 were increased in 24 children (65%) at the time of diagnosis, but they did not intercorrelate in all  
117 patients, *i.e.*, some children had elevated ESR but not CRP and *vice versa*. Only 5 children had  
118 inflammatory-marker values within normal range. ANA were identified in 2 patients (5%). HLA-B27  
119 positivity was detected in 6 children (16%), an incidence twice as high as that in a general Central  
120 European population <sup>24</sup>.

121 Twenty-five children (68%) had family histories of one or more autoimmune diseases in first- and  
122 second-degree relatives (Fig. 2a), most often IBD (6) and psoriasis (3). Twenty-three CRMO patients  
123 (62%) had associated extraosseous conditions (Fig. 2b) at the time of diagnosis or developed them  
124 during follow-up (1-10 years). These were considered as 'complex CRMO' in this study. Thirteen  
125 children (35%) had sacroiliitis (Tab. 1), 7 of them symptomatic. In 6 patients, sacroiliitis remained  
126 clinically silent. Bilateral sacroiliitis was more frequent than unilateral and was not associated with  
127 HLA-B27 positivity. Only one HLA-B27 positive child had MRI-proved sacroiliitis (Fig. 3). In this patient,  
128 sacroiliitis remained asymptomatic despite ongoing inflammation detectable by MRI. On the other  
129 hand, 5 out of 6 HLA-B27 positive children had vertebral lesions (Fig. 3). Four children who were  
130 treated with bisphosphonates achieved regression of sacroiliitis.

131 Eight children in our cohort (22%) developed enteropathic CRMO, osteomyelitis associated with IBD.  
132 Four had family histories of IBD. Tab. 2 summarizes characteristic features and the sequential course  
133 of their disease. CRMO preceded IBD in 3 patients and IBD preceded CRMO in 5. The average delay  
134 between presentation and manifestation of the associated disorder was 4 years. Two children who  
135 initially presented with CRMO and in whom complete remission of bone disease was achieved later  
136 developed IBD without relapse of CRMO. Enteropathic CRMO appears to be a specific subtype of the  
137 disease with a more severe phenotype. Such children in our study frequently suffered from more than  
138 one extraosseous manifestation, including skin disease, sacroiliitis, arthritis, primary sclerosing  
139 cholangitis, and uveitis. All children with enteropathic CRMO had elevated faecal calprotectin levels

140 (Tab. 2). Mild elevation of faecal calprotectin (FCP; up to 250  $\mu\text{g/g}$ ) was found in samples from 9 other  
141 CRMO patients, but they did not progress to IBD, and their FCP levels dropped during follow-up.

142 Arthritis was diagnosed in 7 children (19%); 6 of them had a family history of autoimmune disease.  
143 Arthritis primarily but not exclusively adjoined foci of osteomyelitis. Eight patients (22%) developed  
144 skin disease including acne ( $n=3$ ), pustular psoriasis ( $n=1$ ), palmoplantar pustulosis ( $n=2$ ), and atopic  
145 or unspecified dermatitis ( $n=3$ ). SAPHO syndrome was diagnosed in 3 individuals (8%) based on severe  
146 nodulocystic acne and clavicular involvement with typical imaging findings. All 3 patients had an  
147 inflammatory phenotype at the time of diagnosis. Palmoplantar pustulosis occurred as a paradoxical  
148 effect of TNFi therapy (1x infliximab, 1x adalimumab) in 2 children who initially suffered from IBD and  
149 later manifested CRMO. Their skin disease was managed by topical treatment without withdrawal of  
150 TNFi therapy. One patient presented with chronic remitting pustular dermatitis but was not diagnosed  
151 with psoriasis. Her skin disease continues into adulthood. Two different patients with enteropathic  
152 CRMO had atopic dermatitis and nail pitting, but not skin disease corresponding to psoriasis.

153 In the next part of our study, we aimed to compare solely osteolytic and complex CRMO in children.  
154 A family history of autoimmune diseases was present in 71% of children with osteolytic CRMO and in  
155 65% of children with complex CRMO. No differences were found for blood markers like leukocyte and  
156 platelet counts, haemoglobin, and mean cell volume (MCV) (Fig. 4A). By contrast, inflammatory  
157 activity was significantly higher in complex than in osteolytic disease (CRP,  $p=0.018$ ; ESR,  $p=0.0064$ ;  
158 Fig. 4B). Children with osteolytic CRMO manifested disease slightly earlier (mean  $105 \pm 36$  months)  
159 than did children with complex CRMO (mean  $123 \pm 38$  months); however, the difference was  
160 statistically not significant ( $p=0.1336$ ). Nor did the number of lesions differ between the two groups  
161 (Fig. 4B). Interestingly, we found statistically significant differences in affected sites between the two  
162 groups. Whereas children with osteolytic CRMO often displayed long-bone involvement, children with  
163 complex CRMO presented predominantly with involvement of clavicle and pelvis (clavicle,  $p=0.011$ ;  
164 pelvis,  $p=0.038$ ; Fig. 5). Frequent and almost equal between both patient groups was femoral (50% in  
165 osteolytic CRMO, 48% in complex CRMO) and spinal involvement (43% in osteolytic CRMO, 35% in  
166 complex CRMO; see also Tab. 3).

167 Treatment options used in our cohort are summarized in Fig. 6. All children with osteolytic CRMO and  
168 74% of those with complex CRMO received NSAIDs, including ibuprofen, naproxen, or diclofenac. Half  
169 of the patients were treated with bisphosphonates (pamidronate or zoledronate) because of spinal  
170 involvement or inefficacy of NSAIDs. The percentage of bisphosphonate treatment was similar for the  
171 osteolytic and complex CRMO groups (respectively 43% and 50%), while spinal involvement was  
172 identified in respectively 43% and 35% of children. Children with complex CRMO more often received  
173 conventional synthetic DMARDs, corticosteroids, and biologic therapy (TNFi) (Fig. 6). Substantial  
174 improvement or disease remission was achieved in 27 patients (73%); 7 children (19%) still have active  
175 chronic or remittent disease. Three patients with complex CRMO were lost to follow-up due to non-  
176 compliance.

## 177 Discussion

178 In this study, we focused on different phenotypes of CRMO. We observed that children with  
179 extrasosseous involvement present with significantly increased inflammatory activity, have a distinct  
180 type of bone involvement, and more frequently require escalation to a second-line therapy. No  
181 differences in number of bone lesions and in age at disease onset were found.

182 Some earlier studies noticed phenotypic differences between CRMO patients and endeavoured to  
183 stratify their patients according to severity and disease course <sup>7,17,25</sup>. Wippf et al. defined three  
184 subgroups of CRMO patients <sup>7</sup>. Compared to the mild form, children with intermediate and severe  
185 phenotypes more frequently presented with extraskeletal co-morbidities, multifocal disease, and  
186 inflammatory syndrome. The more aggressive CRMO phenotype, with higher rates of multifocality,  
187 higher ESR, and predominant involvement of feet, tibia, pelvis, and humerus was described in children  
188 with extrasosseous manifestation by Borzutzky and colleagues <sup>6</sup>. In accordance with these findings,  
189 O'Leary et al. demonstrated multifocality of lesions and low response rate to NSAIDs in their Irish  
190 cohort with a high prevalence of extrasosseous involvement. We observed similar differences between  
191 children with and without extrasosseous manifestations. Our findings further suggest that lesions in  
192 complex CRMO patients with affected extraskeletal tissues, particularly skin, gut, and joints, are  
193 differently distributed. Clavicular and pelvic lesions dominated in complex CRMO whereas lesions in  
194 metaphysis of long bones and foot were less frequent (Fig. 5B). On the contrary, foot and long bones,  
195 specifically tibia, were prevalent sites of lesions in osteolytic CRMO. In our group of patients, we  
196 noticed an unusually high incidence of IBD compared with other cohorts. In the subgroup of patients  
197 with IBD, the dominant osteolytic pattern comprises clavicle and pelvis. However, further studies on  
198 a large cohort are required for generalisation of our observations and determination of predictive  
199 value of lesion distribution in CRMO subtypes.

200 Family history has an important, yet not fully understood role in CRMO. More than 50% of children in  
201 reported cohorts had family histories of autoimmune disorders, especially of those on the  
202 spondyloarthritis spectrum. One of the characteristics of these disorders, recently extensively studied,  
203 is the alteration of gut homeostasis and of the enterobiome. Extrasosseous manifestations observed in  
204 our patients and autoimmune diseases in families exhibit similarities (Fig. 2). Arthritis, IBD, and  
205 psoriasis are conditions shared between the two groups. However, specific autoimmune diseases are  
206 not clustered within the families in any apparent pattern. For example, only half of the children with  
207 enteropathic CRMO in our cohort have a family history of IBD. On the other hand, arthritis or psoriasis,  
208 also present in pedigrees of our patients, is known to be associated with alteration of gut microbiota  
209 <sup>26-29</sup>. Thus, it can represent an additional factor contributing to the development of enteropathic  
210 CRMO. Indeed, such correlation was proposed in two CRMO studies <sup>27, 30</sup>. A recent report also  
211 describes successful deployment of a Crohn- disease exclusion diet in a paediatric patient with  
212 enteropathic CRMO <sup>31</sup>. Interestingly, we observed elevated FCP levels in 31% of our patients with  
213 active CRMO (apart from those with the enteropathic form), indicating the presence of subclinical gut



214 inflammation. The retrospective character of this study prevented analysis of the microbiome in our  
215 patients. Nevertheless, a better understanding of the interplay between genetic predispositions,  
216 mirrored in family history of the probands, and environmental factors could promote our  
217 understanding of disease aetiopathogenesis and possibly shape future therapy strategies. A possible  
218 inference is that children with a higher risk of IBD may profit from an earlier switch to TNFi or from  
219 NSAIDs avoidance. Similarly, to identify patients at high risk for development of psoriasis, including  
220 paradoxical disease during TNFi treatment, could encourage concomitant treatment with DMARDS,  
221 such as methotrexate <sup>32,33</sup>.

222 Even though our study has yielded several interesting findings, we must mention limitations that  
223 restrain us from offering general recommendations. First and foremost, the number of children with  
224 CRMO in this cohort is low. The retrospective approach in this study did not allow implementation of  
225 a uniform treatment protocol for all patients and a comprehensive evaluation of the treatment  
226 response. Importantly, our findings are in line with other studies indicating that CRMO is a  
227 heterogeneous disease <sup>34,35</sup> and that “CMRO” might be considered as an umbrella term for  
228 phenotypically similar disorders with potentially diverse etiopathogenetic backgrounds and sterile  
229 osteomyelitis as a dominant feature.

230 In conclusion, osteomyelitis as a dominant phenotypic feature of CRMO is accompanied by  
231 inflammation of other tissues in a substantial group of patients. The disease thus presents in two main  
232 forms, osteolytic and complex. The concept of CRMO as a clinical continuum between these two  
233 distinctive forms impedes definition of diagnostic and therapeutic strategies. A tailored therapy of  
234 CRMO patients remains unavailable. However, a detailed clinical stratification of patients followed by  
235 genetic-epigenetic studies can promote early identification of high-risk patients, who could benefit  
236 from more aggressive treatment with early therapy escalation.

### 237 [Availability of data and materials](#)

238 The datasets used and/or analysed during the current study are available from the corresponding  
239 author on reasonable request.

### 240 [Abbreviations](#)

241 CNO – chronic non-bacterial osteomyelitis

242 CRMO - chronic recurrent multifocal osteomyelitis

243 CRP – C-reactive protein

244 DIRA – deficiency of interleukin-1 receptor antagonist

245 DMARD – disease-modifying anti-rheumatic drug

246 FCP – foetal calprotectin

247 HLA – human leukocyte antigen

248 IBD – inflammatory bowel disease



- 249 MRI – magnetic resonance imaging
- 250 NSAID – non-steroidal anti-inflammatory drug
- 251 SAPHO – synovitis, acne, pustulosis, hyperostosis, osteitis
- 252 TNFi – tumour necrosis factor inhibitor
- 253 WB-MRI – whole-body MRI

## References

1. Bjorksten, B., Gustavson, K.H., Eriksson, B., Lindholm, A. & Nordstrom, S. Chronic recurrent multifocal osteomyelitis and pustulosis palmoplantaris. *J Pediatr* **93**, 227-31 (1978).
2. Giedion, A. Subacute and chronic "symmetrical" osteomyelitis. *Ann Radiol (Paris)* **15**, 329-342 (1972).
3. Jansson, A.F., Grote, V. & Group, E.S. Nonbacterial osteitis in children: data of a German Incidence Surveillance Study. *Acta Paediatr* **100**, 1150-7 (2011).
4. Zhao, Y. & Ferguson, P.J. Chronic Nonbacterial Osteomyelitis and Chronic Recurrent Multifocal Osteomyelitis in children. *Pediatr Clin North Am* **65**, 783-800 (2018).
5. Andronikou, S. et al. Whole-body MRI in the diagnosis of paediatric CNO/CRMO. *Rheumatology (Oxford)* **59**, 2671-2680 (2020).
6. Borzutzky, A. et al. Pediatric chronic nonbacterial osteomyelitis. *Pediatrics* **130**, e1190-7 (2012).
7. Wipff, J. et al. A large national cohort of French patients with chronic recurrent multifocal osteitis. *Arthritis Rheumatol* **67**, 1128-37 (2015).
8. O'Leary, D., Wilson, A.G., MacDermott, E.J., Lowry, C. & Killeen, O.G. Variability in phenotype and response to treatment in chronic nonbacterial osteomyelitis; the Irish experience of a national cohort. *Pediatr Rheumatol Online J* **19**, 45 (2021).
9. Girschick, H. et al. The multifaceted presentation of chronic recurrent multifocal osteomyelitis: a series of 486 cases from the Eurofever international registry. *Rheumatology (Oxford)* **57**, 1203-1211 (2018).
10. Zhao, Y. et al. Consensus treatment plans for Chronic Nonbacterial Osteomyelitis refractory to Nonsteroidal Antiinflammatory Drugs and/or with active spinal lesions. *Arthritis Care Res (Hoboken)* **70**, 1228-1237 (2018).
11. Cox, A.J. et al. Recessive coding and regulatory mutations in FBLIM1 underlie the pathogenesis of chronic recurrent multifocal osteomyelitis (CRMO). *PLoS One* **12**, e0169687 (2017).
12. d'Adamo, A.P. et al. High prevalence of rare FBLIM1 gene variants in an Italian cohort of patients with Chronic Non-bacterial Osteomyelitis (CNO). *Pediatr Rheumatol Online J* **18**, 55 (2020).
13. Ferguson, P.J. et al. Homozygous mutations in LPIN2 are responsible for the syndrome of chronic recurrent multifocal osteomyelitis and congenital dyserythropoietic anaemia (Majeed syndrome). *J Med Genet* **42**, 551-7 (2005).
14. Aksentijevich, I. et al. An autoinflammatory disease with deficiency of the interleukin-1-receptor antagonist. *N Engl J Med* **360**, 2426-37 (2009).
15. <https://omim.org/>.
16. Vittecoq, O. et al. Evolution of chronic recurrent multifocal osteitis toward spondylarthropathy over the long term. *Arthritis Rheum* **43**, 109-19 (2000).
17. Jansson, A. et al. Classification of non-bacterial osteitis: retrospective study of clinical, immunological and genetic aspects in 89 patients. *Rheumatology (Oxford)* **46**, 154-60 (2007).
18. Beck, C. et al. Chronic nonbacterial osteomyelitis in childhood: prospective follow-up during the first year of anti-inflammatory treatment. *Arthritis Res Ther* **12**, R74 (2010).
19. Kostik, M.M., Kopchak, O.L., Chikova, I.A., Isupova, E.A. & Mushkin, A.Y. Comparison of different treatment approaches of pediatric chronic non-bacterial osteomyelitis. *Rheumatol Int* **39**, 89-96 (2019).
20. Schnabel, A., Range, U., Hahn, G., Berner, R. & Hedrich, C.M. Treatment response and longterm outcomes in children with Chronic Nonbacterial Osteomyelitis. *J Rheumatol* **44**, 1058-1065 (2017).

21. Dushnicky, M.J. et al. Pediatric patients with a dual diagnosis of Inflammatory Bowel Disease and Chronic Recurrent Multifocal Osteomyelitis. *J Pediatr Gastroenterol Nutr* **73**, 626-629 (2021).
22. Sag, E. et al. Chronic recurrent multifocal osteomyelitis in children: a single center experience over five years. *Turk J Pediatr* **61**, 386-391 (2019).
23. Roderick, M.R., Shah, R., Rogers, V., Finn, A. & Ramanan, A.V. Chronic recurrent multifocal osteomyelitis (CRMO) - advancing the diagnosis. *Pediatr Rheumatol Online J* **14**, 47 (2016).
24. Khan, M.A. HLA-B27 and its subtypes in world populations. *Curr Opin Rheumatol* **7**, 263-9 (1995).
25. Chamot, A.M. et al. [Acne-pustulosis-hyperostosis-osteitis syndrome. Results of a national survey. 85 cases]. *Rev Rhum Mal Osteoartic* **54**, 187-96 (1987).
26. Gracey, E. et al. Revisiting the gut-joint axis: links between gut inflammation and spondyloarthritis. *Nat Rev Rheumatol* **16**, 415-433 (2020).
27. Zhao, D.Y., McCann, L., Hahn, G. & Hedrich, C.M. Chronic nonbacterial osteomyelitis (CNO) and chronic recurrent multifocal osteomyelitis (CRMO). *J Transl Autoimmun* **4**, 100095 (2021).
28. Myers, B. et al. The gut microbiome in psoriasis and psoriatic arthritis. *Best Pract Res Clin Rheumatol* **33**, 101494 (2019).
29. Verwoerd, A., Ter Haar, N.M., de Roock, S., Vastert, S.J. & Bogaert, D. The human microbiome and juvenile idiopathic arthritis. *Pediatr Rheumatol Online J* **14**, 55 (2016).
30. Ter Horst, R. et al. Host and environmental factors influencing individual human cytokine responses. *Cell* **167**, 1111-1124 e13 (2016).
31. Cantarelli, E., Baccelli, F., Simonini, G. & Alvisi, P. Chronic Recurrent Multifocal Osteomyelitis associated with Crohn Disease: A potential role of exclusion diet? Comment on Starz et al. The Modification of the gut microbiota via selected specific diets in patients with Crohn's Disease. *Nutrients* 2021, 13, 2125. *Nutrients* **13**(2021).
32. Pugliese, D. et al. Paradoxical psoriasis in a large cohort of patients with inflammatory bowel disease receiving treatment with anti-TNF alpha: 5-year follow-up study. *Aliment Pharmacol Ther* **42**, 880-8 (2015).
33. Rosenwasser, N., Lee, D., Sidbury, R. & Zhao, Y. Paradoxical Psoriasis in children receiving anti-TNFalpha treatment for inflammatory/autoimmune disease. *Paediatr Drugs* **23**, 131-141 (2021).
34. Prakken, B., Albani, S. & Martini, A. Juvenile idiopathic arthritis. *Lancet* **377**, 2138-49 (2011).
35. Thatayatikom, A., Modica, R. & De Leucio, A. Juvenile Idiopathic Arthritis. in *StatPearls* (Treasure Island (FL), 2022).

## Acknowledgement

We would like to thank A. S. Knisely (Med Univ Graz, Austria) for critical comments and revision of the manuscript.

## Funding

This study was supported by a grant from the Czech Health Research Council, Ministry of Health, Czech Republic (NU20-05-00320) and Ministry of Health, Czech Republic – conceptual development of research organization, Motol University Hospital, Prague, Czech Republic (00064203). MC and ZK were funded by Czech Science Foundation (19-0704S).

## Author information

### Contributions

DC designed the study, provided patient information and wrote the manuscript, HM provided patient information and reviewed manuscript, VK re-assessed X-ray and WBMR imaging and reviewed manuscript, ZK performed statistical analyses, OS contributed to data analyses and reviewed the manuscript, LW provided patient data and reviewed the manuscript, JB contributed to data analyses and reviewed the manuscript, ZŠ contributed to data analyses and reviewed the manuscript, MK re-assessed X-ray and WBMR imaging, provided WBMR pictures for Fig. 5B and reviewed manuscript, MC contributed to the critical revisions of manuscript, data analyses and prepared the figures and tables, RH contributed to data analyses and reviewed the manuscript. All authors agreed with final version of the manuscript.

### Corresponding author

Correspondence to Dita Cebecauerova ( [Dita.Cebecauerova@fnmotol.cz](mailto:Dita.Cebecauerova@fnmotol.cz) ).

## Ethics declarations

### Ethics approval and consent to participate

All participants or their legal guardians gave written consent in participating in the study. The study was performed as an retrospective cohort study according to the principles of the Declaration of Helsinki and was approved by the local ethics committee at the University Hospital Motol (protocol No. EK 1412/20).

## Figure legends

**Figure 1. A graphical scheme summarising critical findings in our cohort.** CRP – C-reactive protein, DMARD - disease-modifying antirheumatic drugs, ESR - erythrocyte sedimentation rate, IBD – inflammatory bowel disease, NSAID - non-steroidal anti-inflammatory drugs, TNFi – tumour necrosis factor  $\alpha$  inhibitors.

**Figure 2. Autoimmunity profiles. A)** Summary of total autoimmune disease manifestations in the first- and second-degree relatives and of **B)** extraosseous comorbidities in CRMO patients. CGD – chronic granulomatous disease, GPA – granulomatosis with polyangiitis, HSP – Henoch-Schönlein purpura, IBD – inflammatory bowel disease, PD – phagocytic dysfunction, PPP – palmoplantar pustulosis, PSC – primary biliary cirrhosis RA – rheumatoid arthritis

**Figure 3. Vertebral and sacroiliac involvement.** HLA-B27 positive children with CRMO displayed sacroiliac involvement less frequently than spinal involvement. Vertebral lesions were twice as frequent as in the cohort. Sacroiliitis in HLA-B27 positive CRMO was less frequent than sacroiliitis in HLA-B27 negative CRMO children and in non-selected CRMO children.

**Figure 4. Comparison of laboratory characteristics between osteolytic and complex CRMO patients. A.** Charts comparing blood markers, white blood count, platelets, haemoglobin, and mean cell volume (MCV) for the two groups of CRMO patients. Data are presented as boxplots with the 25th, 50th (median), and 75th percentiles marked. Whiskers extend to the most extreme data points. Squares represent individual patients. An asterisk (\*) indicates statistical significance ( $p < 0.05$ ). **B.** Comparison of inflammatory markers, number of lesions, and age at onset between osteolytic and complex CRMO. Data are presented as boxplots with the 25th, 50th (median), and 75th percentiles marked. Whiskers extend to the most extreme data points. Squares represent individual patients. An asterisk (\*) and two asterisks (\*\*) indicate statistical significance ( $p < 0.05$  and  $p < 0.01$ , respectively).

**Figure 5. Distribution of CRMO lesions in osteolytic CRMO patients (left) and complex CRMO patients (right). A.** Frequencies  $\geq 35\%$  are considered important (bold). P-values for each site are summarized in Table 3. **B.** Dominant patterns (red) of affected bones in osteolytic CRMO (left) and complex CRMO (right) with illustrative cases of WB-MRI. Arrowheads indicate main affected sites.

**Figure 6. Treatments applied in patients with osteolytic (dark grey) and complex (light grey) CRMO.** NSAID - non-steroidal anti-inflammatory drugs, DMARDs – disease modifying antirheumatic drugs, CS – corticosteroids, BIS – bisphosphonates, TNFi – tumour necrosis factor  $\alpha$  inhibitors

## Tables

**Table 1. Demographic and clinical characteristics of the cohort**

|                                                   |                 |
|---------------------------------------------------|-----------------|
| <b>Total number of patients</b>                   | <b>37</b>       |
| <b>Female</b>                                     | 30 (81%)        |
| <b>Male</b>                                       | 7 (19%)         |
| <b>Ethnicity</b>                                  |                 |
| - Romani                                          | 4 (11%)         |
| - Other Czech                                     | 33 (89%)        |
| <b>Age at onset, years; median (range)</b>        | 10 (4.6 – 17.3) |
| <b>Number of lesions; median (range)</b>          | 7 (1-19)        |
| <b>Skeletal involvement</b>                       |                 |
| - Unifocal                                        | 3 (8%)          |
| - Multifocal                                      | 34 (92%)        |
| <b>Initial symptom</b>                            |                 |
| - Back pain                                       | 14 (38%)        |
| - Limb pain                                       | 19 (51%)        |
| - Other                                           | 4 (11%)         |
| <b>Bone biopsy</b>                                | 23 (62%)        |
| <b>Spinal lesions</b>                             | 14 (38%)        |
| - Spinal surgery                                  | 7 (19%)         |
| <b>Sacroiliac joint involvement</b>               | 13 (35%)        |
| <b>Inflammatory bowel disease</b>                 | 8 (22%)         |
| <b>Psoriasis / palmoplantar pustulosis</b>        | 3 (8%)          |
| <b>Nodulocystic acne</b>                          | 3 (8%)          |
| <b>Unspecific dermatitis involvement</b>          | 3 (8%)          |
| <b>Autoimmune comorbidities in family history</b> | 25 (68%)        |
| - First-degree (I) relatives                      | 15              |
| - Second-degree (II) relatives                    | 13              |
| <b>Anti-nuclear antibodies present</b>            | 2 (5%)          |
| <b>HLA-B27 present</b>                            | 6 (16%)         |



| No. | Gender | No. foci | Autoantibodies  | Histology  | Disease course                                                 | Delay (years) | Therapy                                  | Outcome                        | HLA-B27  | FCP (µg/g) | Family history        |
|-----|--------|----------|-----------------|------------|----------------------------------------------------------------|---------------|------------------------------------------|--------------------------------|----------|------------|-----------------------|
| 1.  | F      | 7        | ASCA positive   | NS colitis | 1. CRMO, arthritis<br>2. colitis + CRMO relapse                | 5.0           | SSZ --> P-->ADA+MTX --> none             | remission, now without therapy | negative | 1000       | II. HLA-B27 AS        |
| 2.  | M      | 10       | p-ANCA positive | CD         | 1. IBD<br>2. PPP<br>3. CRMO + IBD relapse                      | 4.0           | AZA, IFX, IFX+MTX -->ADA                 | relapsing IBD and CRMO         | negative | 1736       | I. IBD                |
| 3.  | F      | 2        | ASCA positive   | CD         | 1. CRMO, arthritis<br>2. IBD<br>3. HSP<br>4. acute uveitis     | 0.5           | SSZ --> ETA+MTX --> ADA, AZA             | remission on therapy           | positive | 350        | I. IBD                |
| 4.  | F      | 9        | ASCA positive   | CD         | 1. IBD<br>2. CRMO+PPP                                          | 4.0           | AZA -->IFX-->ADA-->ADA+SSZ-->ADA+MTX+SSZ | remission on therapy           | negative | 3329       | II. psoriasis         |
| 5.  | F      | 3        | p-ANCA positive | UC         | 1. IBD<br>2. relapsed IBD+CRMO                                 | 2.5           | P+AZA-->5-ASA-->ADA+MTX                  | remission on therapy           | negative | 938        | negative              |
| 6.  | F      | 11       | negative        | UC, PSC    | 1. IBD, PSC<br>2. CRMO                                         | 4.0           | 5-ASA, UDCA, PAM-->ADA                   | active CRMO, IBD in remission  | negative | 1680       | II. IBD               |
| 7.  | M      | 7        | p-ANCA positive | CD         | 1. CRMO, arthritis<br>2. IBD (arthritis and CRMO in remission) | 7.5           | NSAID--> SSZ, P, MTX --> ADA             | active IBD, CRMO in remission  | negative | 1230       | unknown               |
| 8.  | M      | 9        | negative        | CD         | 1. CRMO<br>2. IBD (CRMO in remission)                          | 4.0           | NSAID--> P-->5-ASA-->non-compliance      | active IBD, CRMO in remission  | negative | 545        | I. IBD, II. psoriasis |

Table 2. Characteristics of patients with enteropathic chronic recurrent multifocal osteomyelitis

Abbreviations: ADA – adalimumab, ANCA – anti-neutrophil cytoplasmic antibody, ASCA – anti-*Saccharomyces cerevisiae* antibody, 5-ASA – 5-aminosalicylic acid, AZA – azathioprine, CD – Crohn disease, CRMO – chronic recurrent multifocal osteomyelitis, ETA – etanercept, FCP – foetal calprotectin, I. – first-degree relative, II. – second-degree relative, HLA-B27 – human leucocyte antigen B27, HLA-B27 AS – HLA-B27 positive ankylosing spondylitis, IBD – inflammatory bowel disease, IFX – infliximab, MTX – methotrexate, NS colitis – non-specific colitis, NSAID – non-steroidal anti-inflammatory drug, P – prednisone, PAM – pamidronate, PPP – palmo-plantar pustulosis, PSC – primary sclerosing cholangitis, SSZ – sulphasalazine, UC – ulcerative colitis, UDCA – ursodeoxycholic acid.

**Table 3. Distribution of lesions in patients with osteolytic and complex CRMO**

| Affected site         | Osteolytic CRMO<br>(no = 14) | Complex CRMO<br>(n = 23) | P value |
|-----------------------|------------------------------|--------------------------|---------|
| skull                 | 1                            | 1                        | 1.000   |
| mandible              | 2                            | 0                        | 0.137   |
| scapula               | 1                            | 1                        | 1.000   |
| clavicle              | 1                            | 12                       | 0.011   |
| sternum               | 1                            | 6                        | 0.217   |
| humerus               | 5                            | 3                        | 0.215   |
| radius                | 3                            | 3                        | 0.653   |
| ribs                  | 3                            | 2                        | 0.346   |
| spine                 | 6                            | 8                        | 0.732   |
| pelvis (incl. sacrum) | 5                            | 17                       | 0.038   |
| femur                 | 7                            | 11                       | 1.000   |
| tibia                 | 9                            | 7                        | 0.086   |
| fibula                | 2                            | 3                        | 1.000   |
| talus                 | 2                            | 3                        | 1.000   |
| calcaneus             | 4                            | 2                        | 0.173   |
| feet with digits      | 7                            | 6                        | 0.171   |

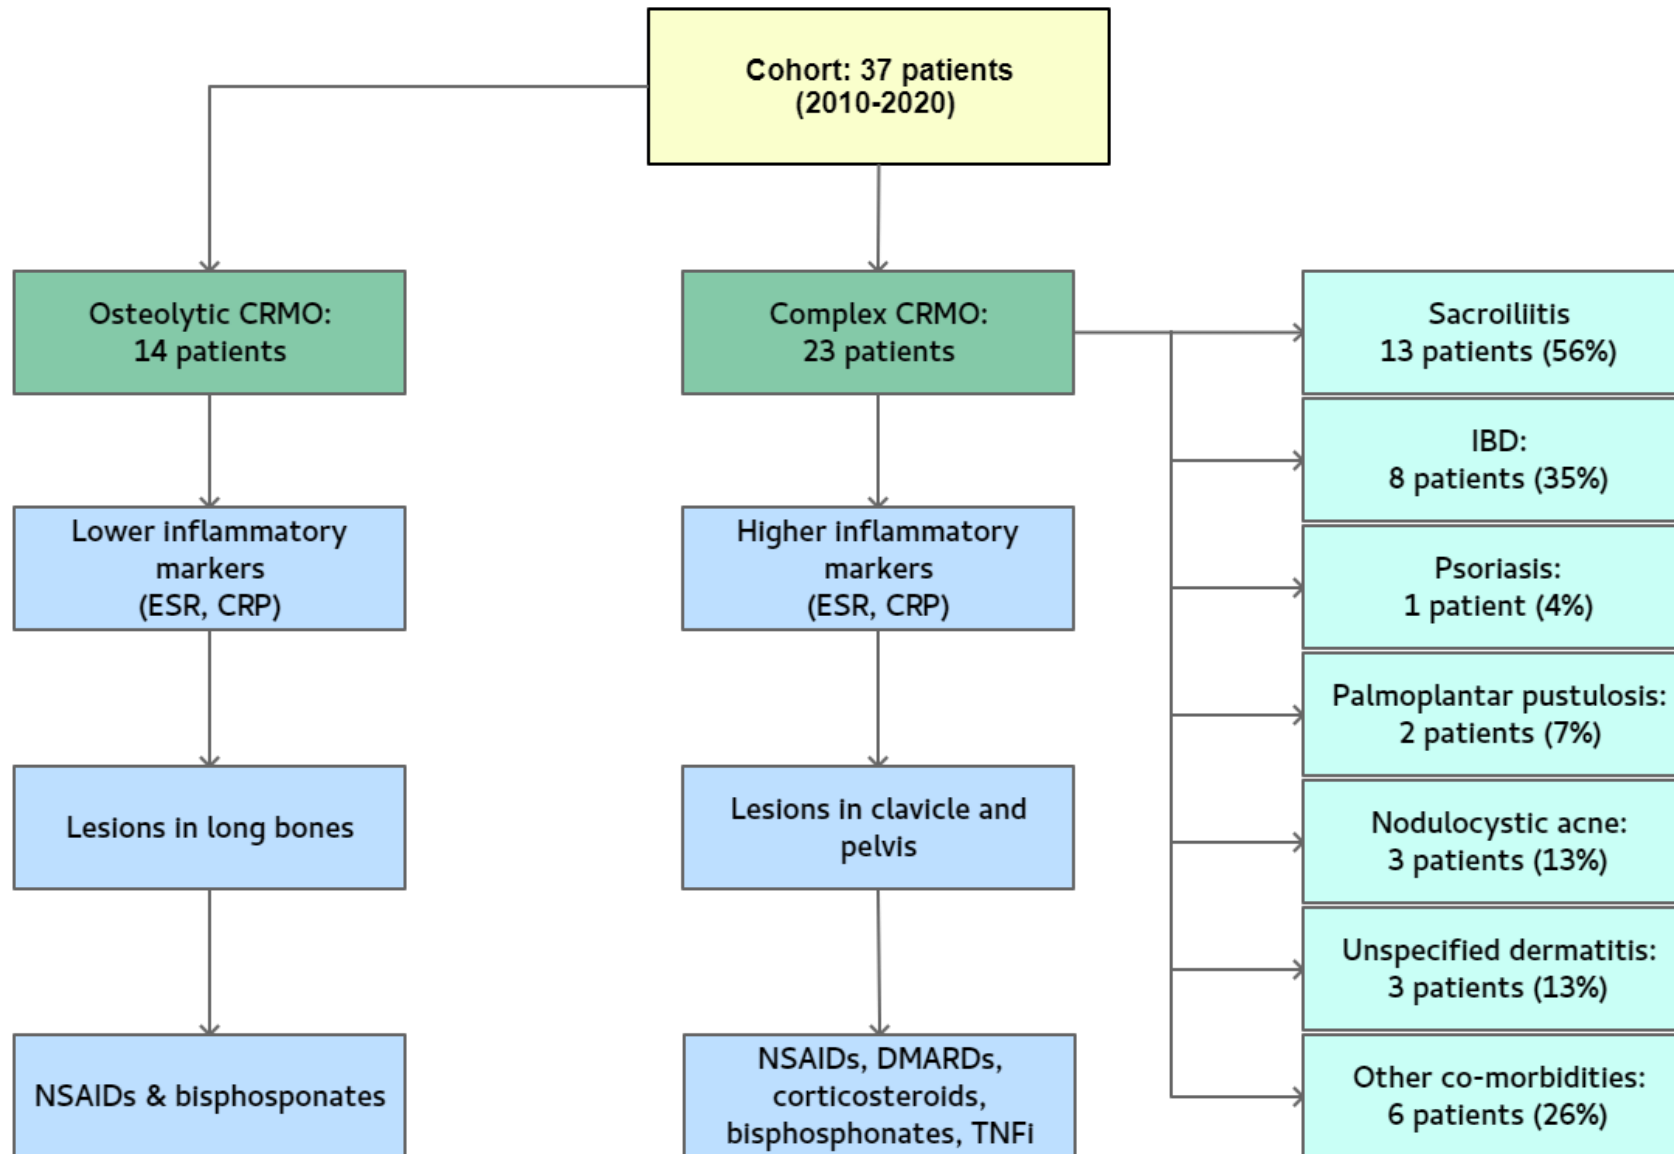

Cebecauerova Figure 1

**A****Autoimmune diseases in first- or second-degree relatives**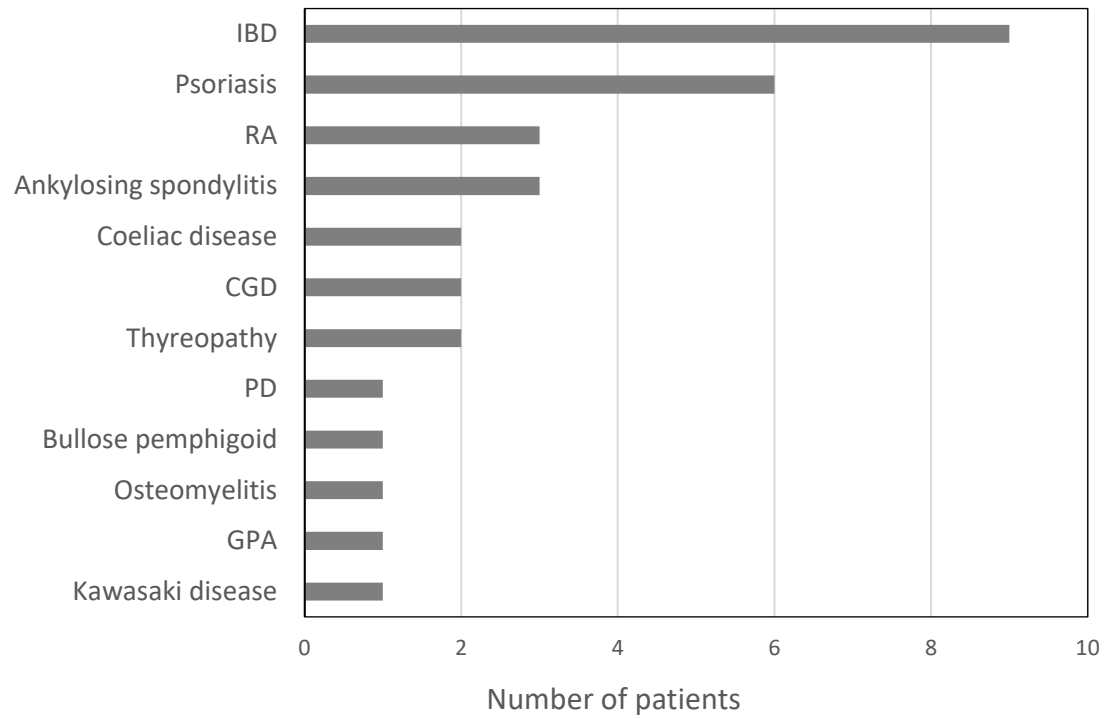**B****Extraosseous manifestations**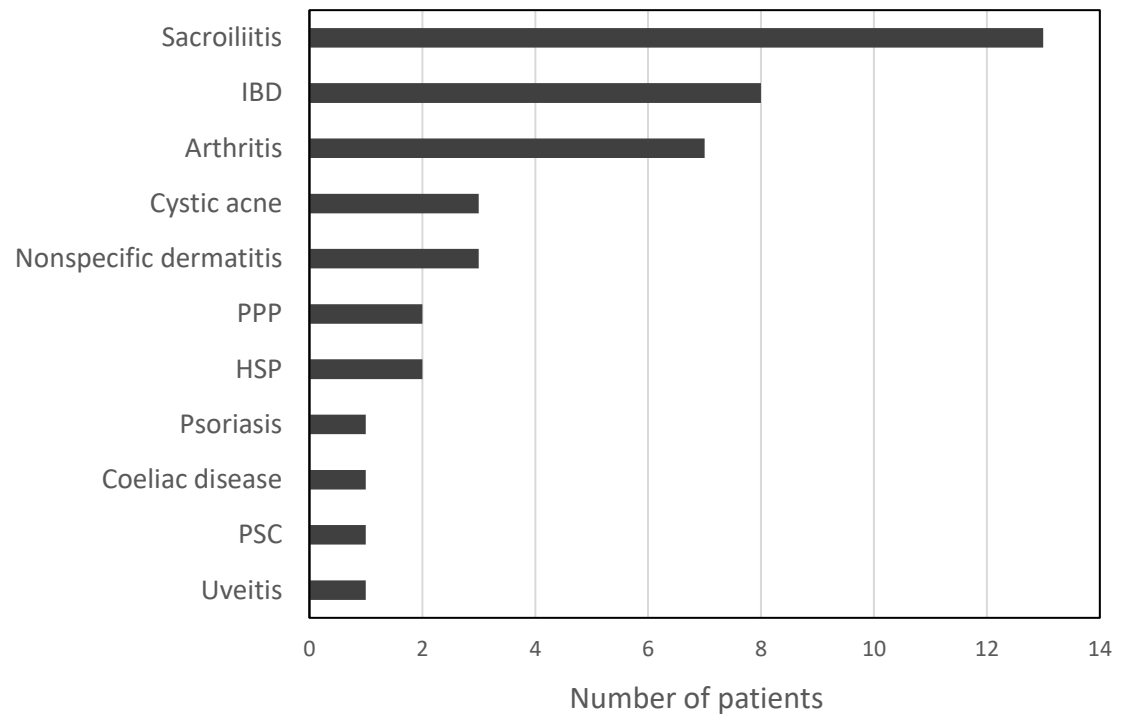

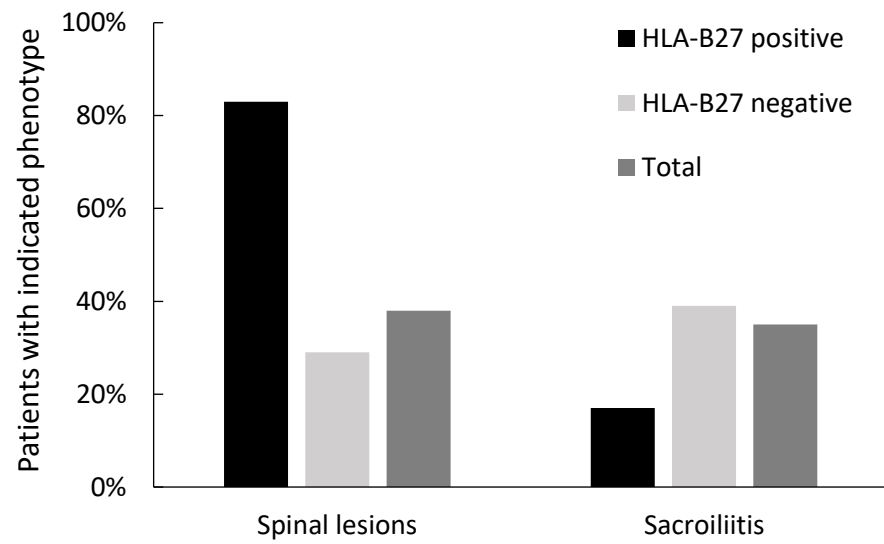

Cebecauerova Figure 3

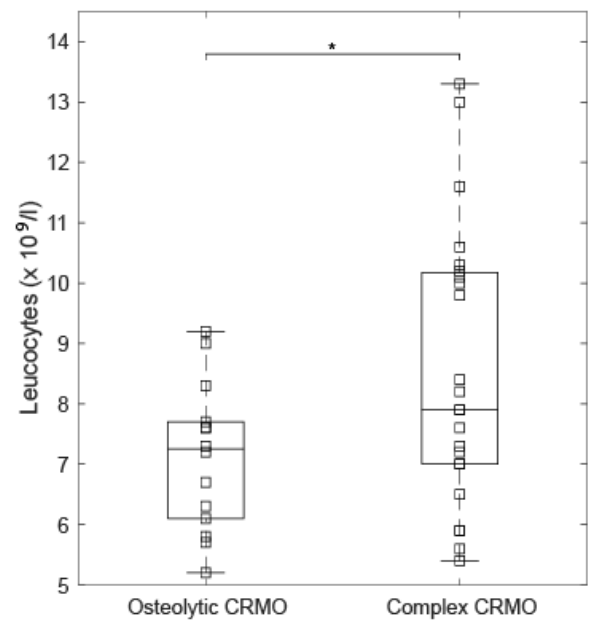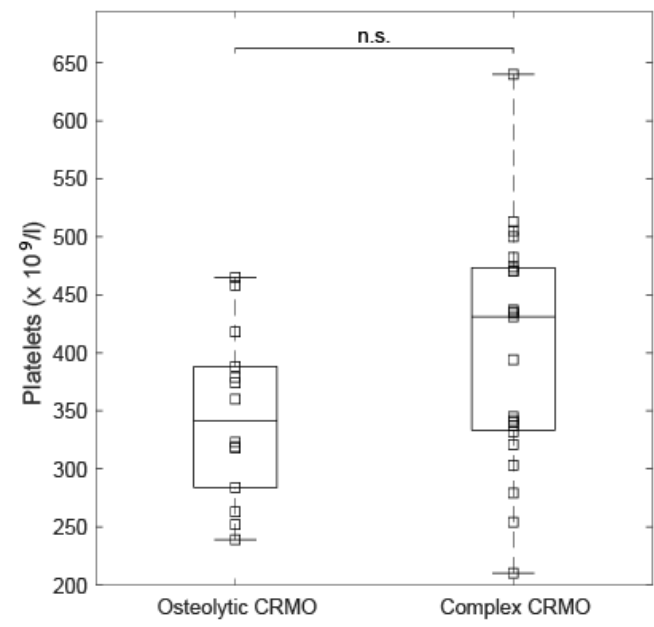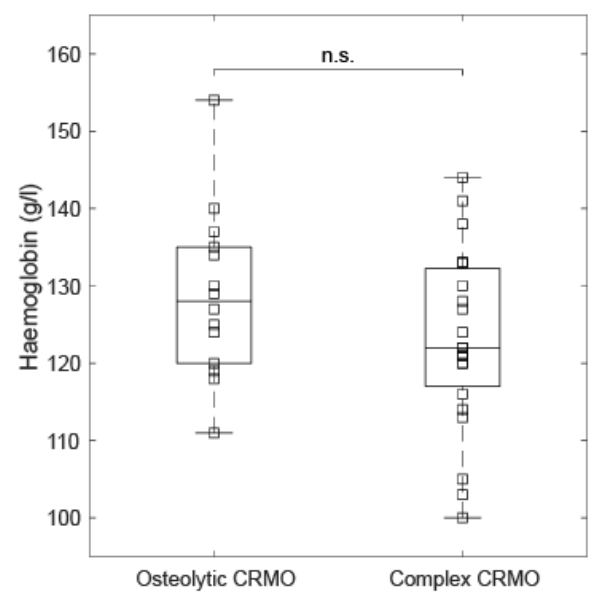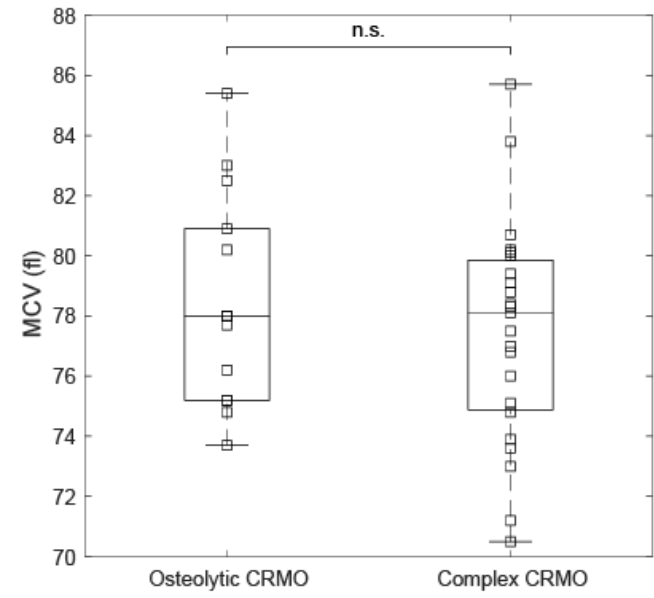

Cebecauerova Figure 4A



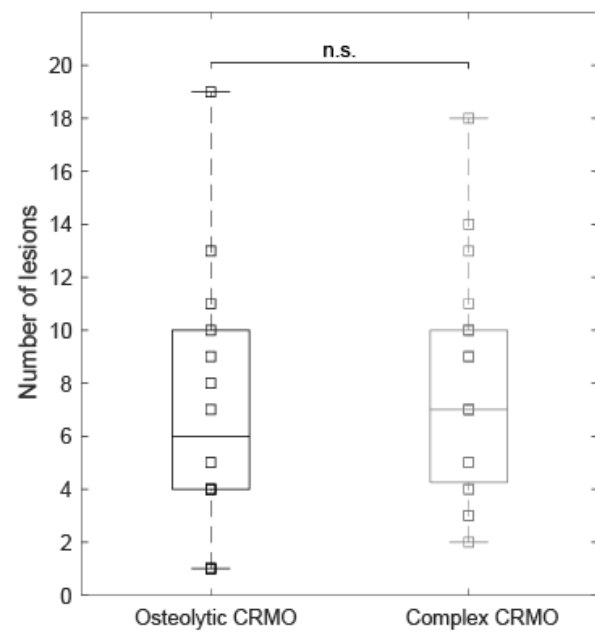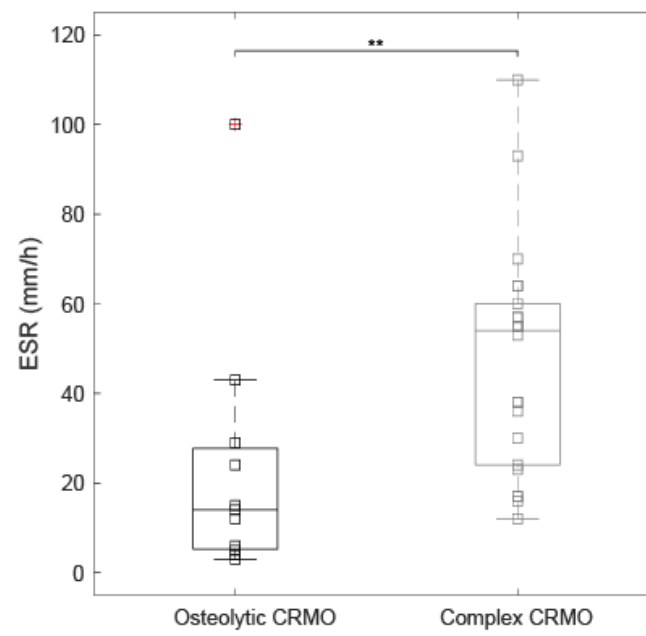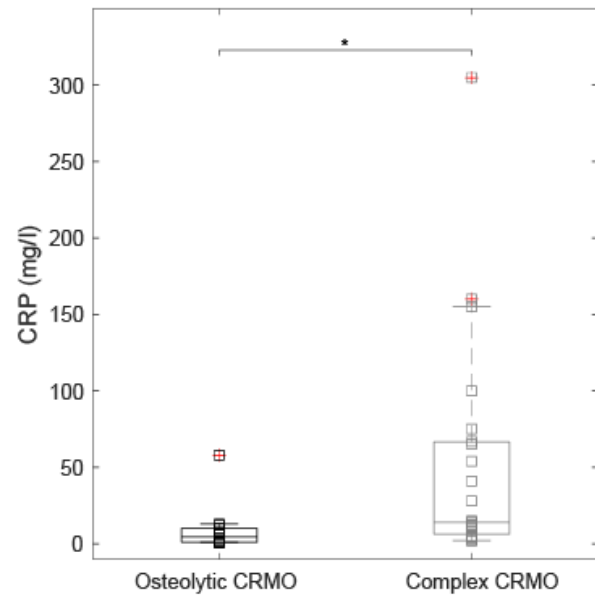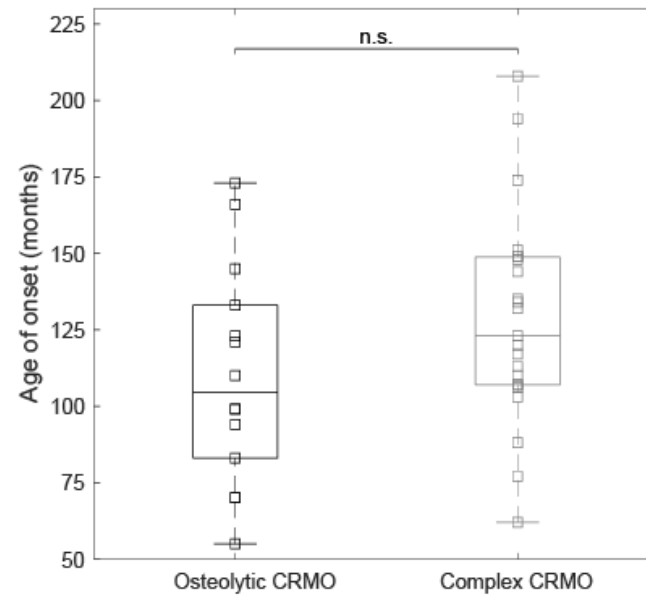

Cebecauerova Figure 4B

# Osteolytic CRMO (14 patients)

# Complex CRMO (23 patients)

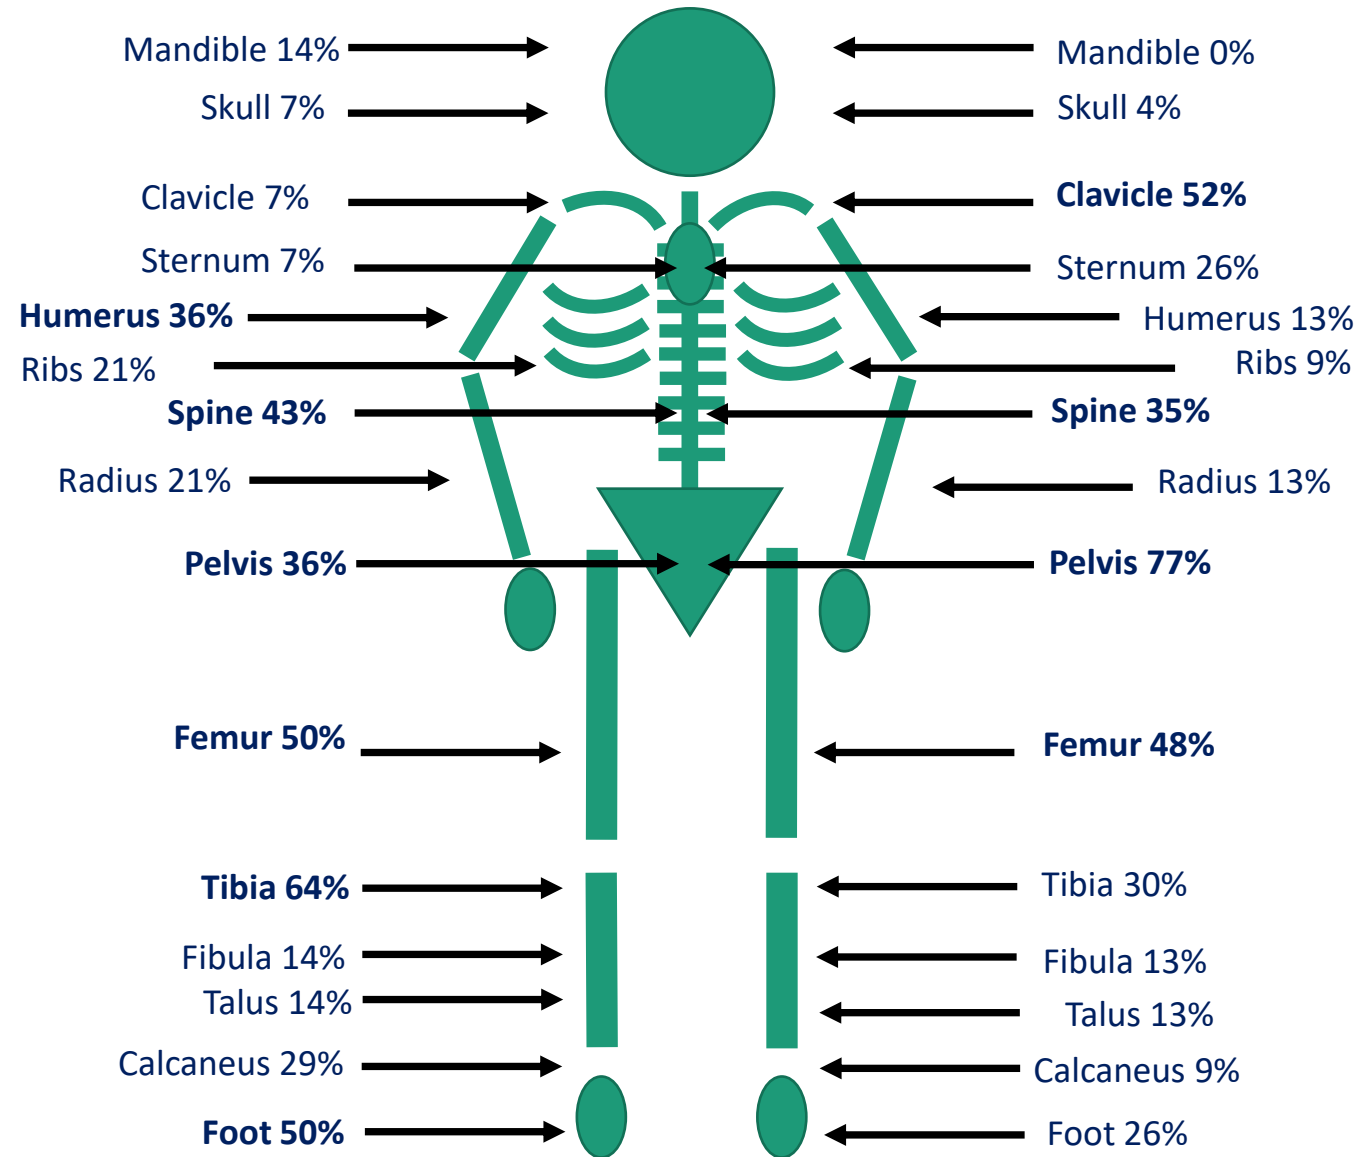

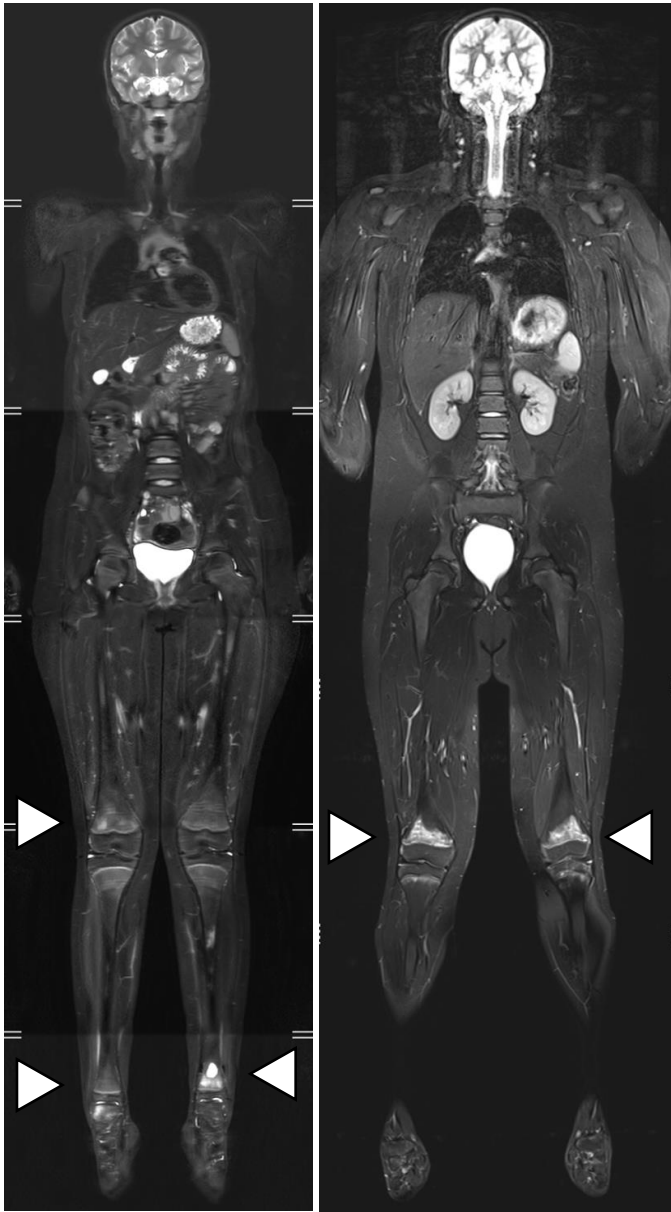

Osteolytic CRMO

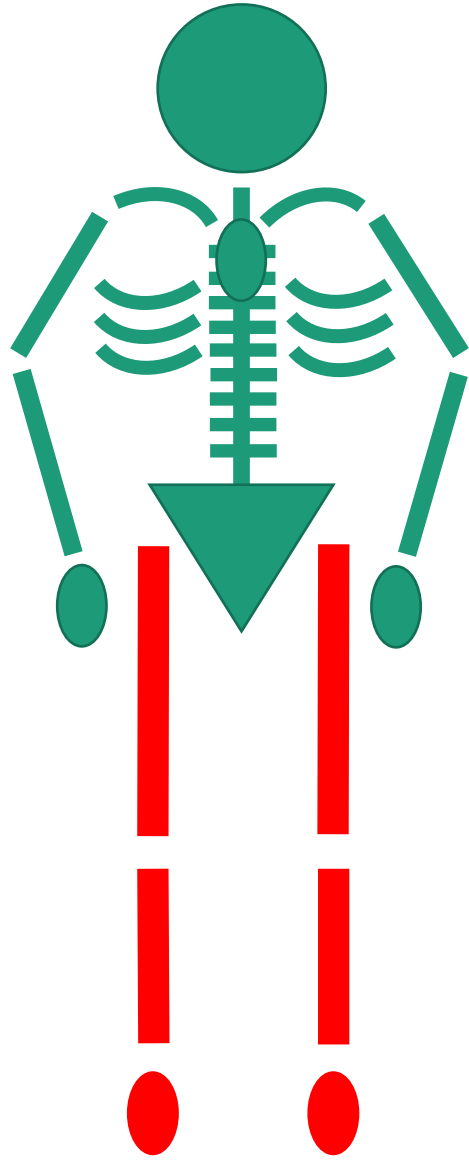

Complex CRMO

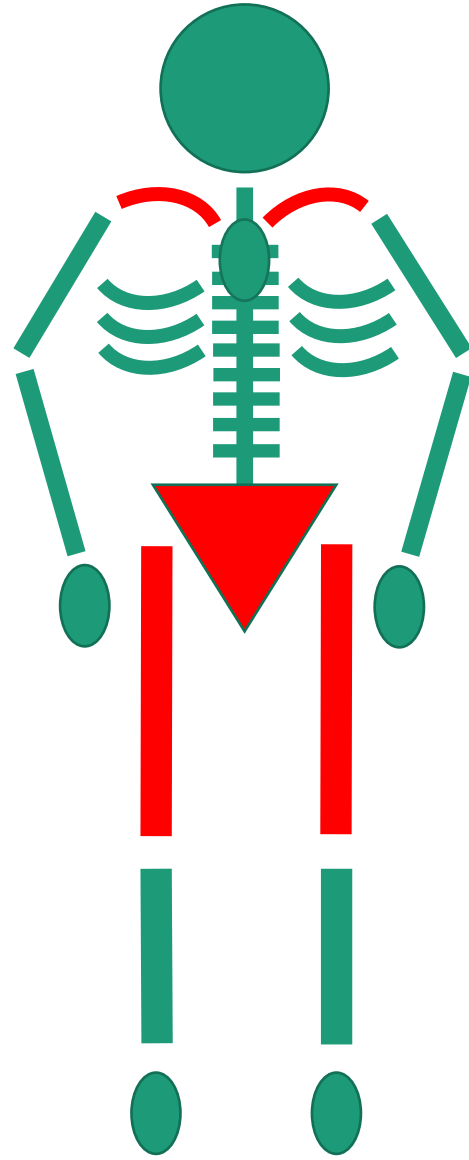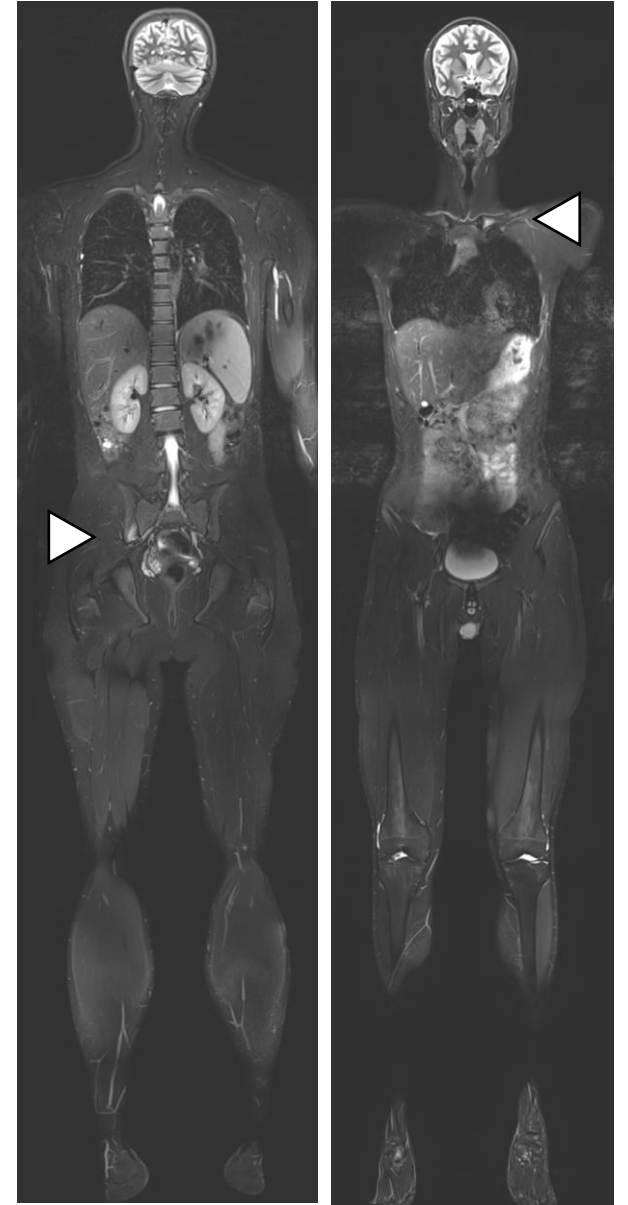

Cebecauerova Figure 5B

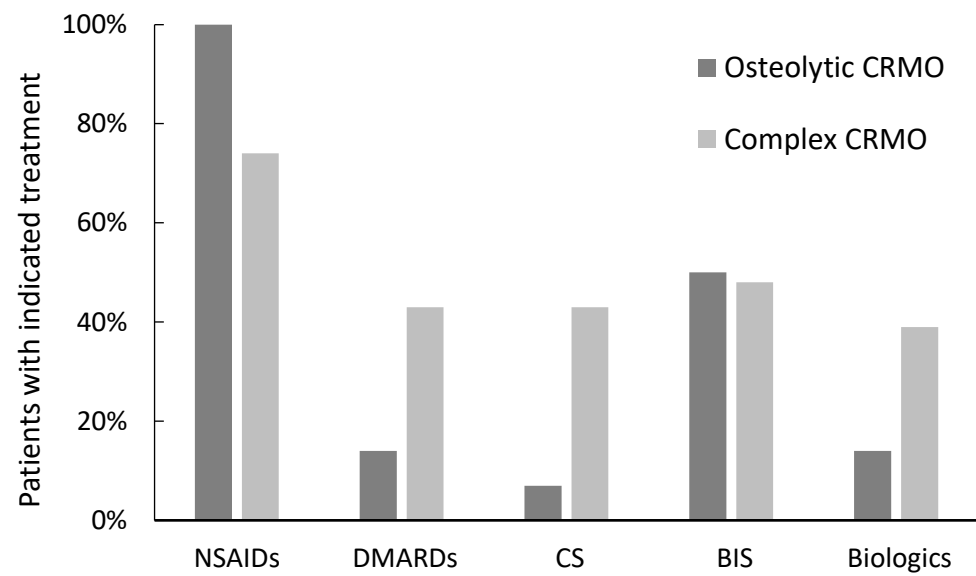

Cebecauerova Figure 6
